# Supplementary material for: A contrasting function for miR-137 in embryonic mammogenesis and adult breast carcinogenesis
Source: PubMed Central journal article supplement (PMC4673145; doi:10.18632/oncotarget.4218), 2015-05-20
Supplement: oncotarget-06-22048-s001.pdf [file oncotarget-06-22048-s001.pdf]

# A contrasting function for miR-137 in embryonic mammaryogenesis and adult breast carcinogenesis

## Supplementary Material

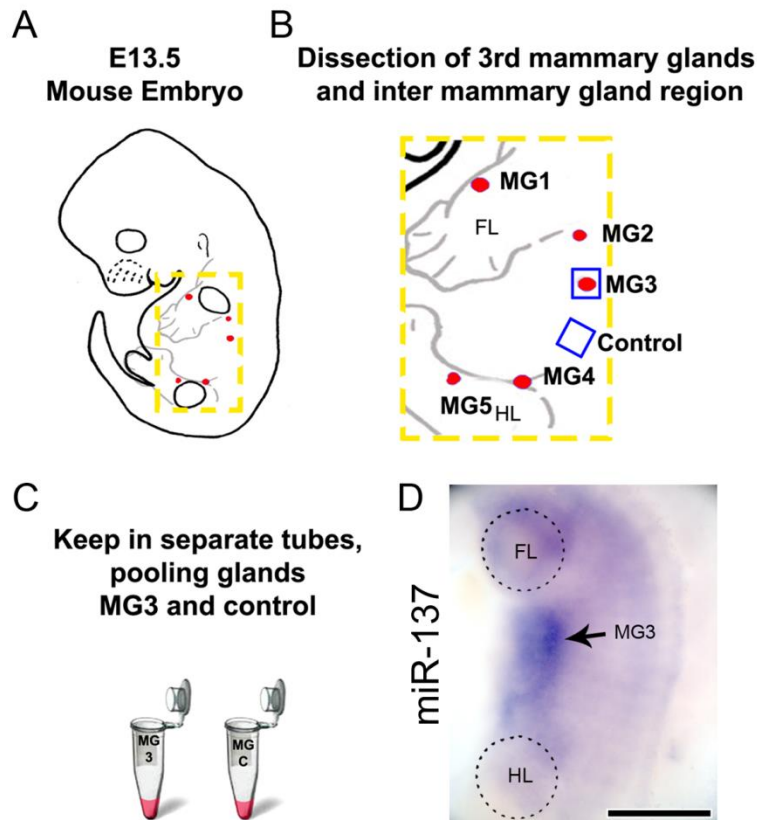

Figure S1: Experimental procedure of isolating 3<sup>rd</sup> mammary bud and mammary flank tissue.

(A) E13.5 ICR mouse embryos are used for microRNA macroarray and micro-array. (B) Blue boxes indicate the regions isolated to compare 3<sup>rd</sup> mammary gland and mammary flank. (C) 3<sup>rd</sup> mammary gland and mammary flank tissues were collected and kept separate for performing the microarray analysis. (D) MiR-137 is highly expressed in the 3<sup>rd</sup> mammary gland forming region (arrow). FL, fore limb; HL, hind limb; MG, mammary gland; Scale bar, 1 mm.

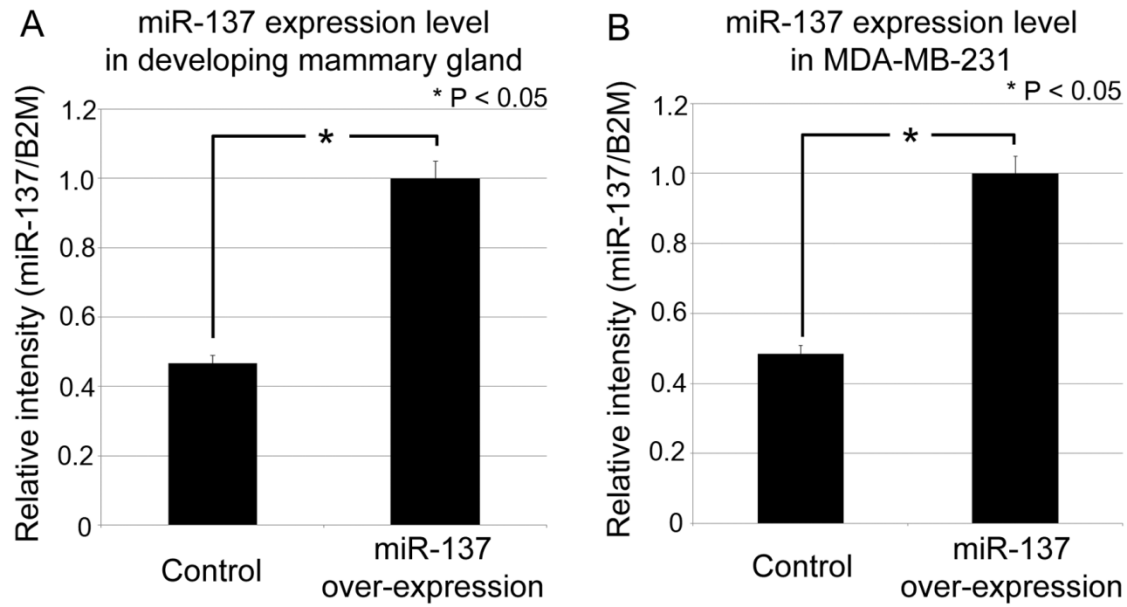

Figure S2: Efficiency of miR-137 over-expression by RT-qPCR.

(A) Level of miR-137 over-expression in developing mammary gland. (B) Level of miR-137 in MDA-MB-231 cell.

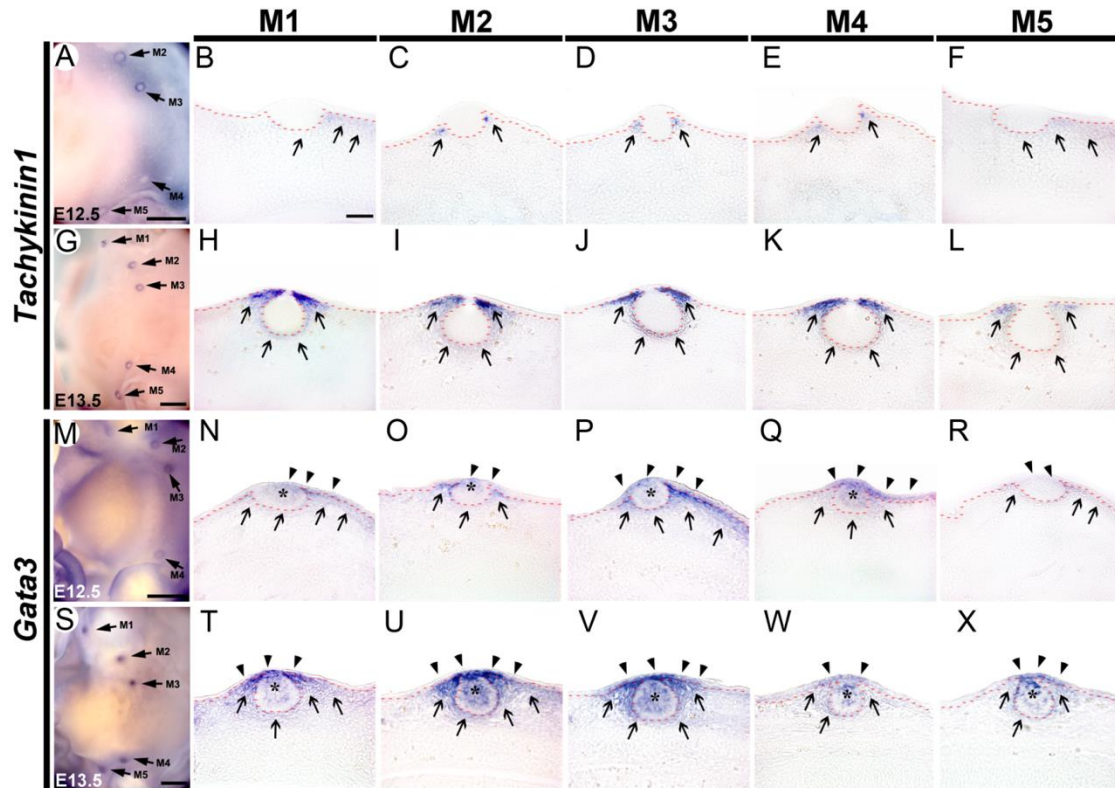

Figure S3: *Tac1* and *Gata3* expression patterns during mouse mammary gland development.

(A-X) In order to confirm expression patterns of *Tac1* and *Gata3*, we performed *in situ* hybridization at E12.5 and E13.5. (A) At E12.5, a ring-like shape of *Tac1* expression pattern is detected in 2<sup>nd</sup> to 4<sup>th</sup> mammary bud. (B, F) *Tac1* is also weakly expressed in mesenchyme dorsal to 1<sup>st</sup> and 5<sup>th</sup> mammary buds. (C-E) Strong *Tac1* expression detected in mammary mesenchyme at the margin of mammary epithelium and responsible for the ring of expression seen in whole mounts. (G) At E13.5, the ring-like shape of *Tac1* expression observed in all mammary buds 1<sup>st</sup> to 5<sup>th</sup>. (H-L) *Tac1* expressed mammary mesenchyme surrounding mammary epithelium. Strong *Tac1* expression detected in mesenchyme beneath nipple forming region of epithelium. (M) *Gata3* expressed in mammary buds at E12.5. (N-R) *Gata3* expressed both in mammary epithelium and mesenchyme at E12.5. (N) In 1<sup>st</sup> mammary gland, similar levels of *Gata3* expression observed in mammary epithelium and mesenchyme dorsal to mammary bud, weakly

expressed in ventral mesenchyme at E12.5. (O) *Gata3* detected in both 2<sup>nd</sup> mammary epithelium and surrounding mesenchyme at E12.5. Strong *Gata3* expression observed in mesenchyme beneath nipple forming region of epithelium. (P) In 3<sup>rd</sup> mammary bud, *Gata3* strongly expressed in dorsal region of mammary epithelium and mesenchyme. (Q) *Gata3* expression more strongly observed in mammary epithelium dorsally compared to mesenchyme at E12.5. (R) In 5<sup>th</sup> mammary bud, weak *Gata3* expression detected in mammary epithelium and mesenchyme compared to other mammary buds. (S) Stronger *Gata3* expression observed in E13.5 mammary bud compared to E12.5. (T) *Gata3* expressed both in epithelium and mesenchyme of 1<sup>st</sup> mammary bud near nipple forming region at E13.5. (U-V) Similar *Gata3* expression pattern observed in 2<sup>nd</sup> to 3<sup>rd</sup> mammary bud compared with 1<sup>st</sup> mammary bud. (W) In 4<sup>th</sup> mammary bud, *Gata3* more weakly expressed both in mammary epithelium and mesenchyme. (X) In 5<sup>th</sup> mammary bud, *Gata3* expressed in mammary bud, and higher levels in dorsal mesenchyme still present. Black arrows, mesenchymal gene expression; Arrowheads, epithelial gene expression; Asterisks, gene expression in mammary bud, M, mammary bud; Scale bar, B-F, H-L, N-R, T-X, 100µm, A, G, M, S, 1mm.

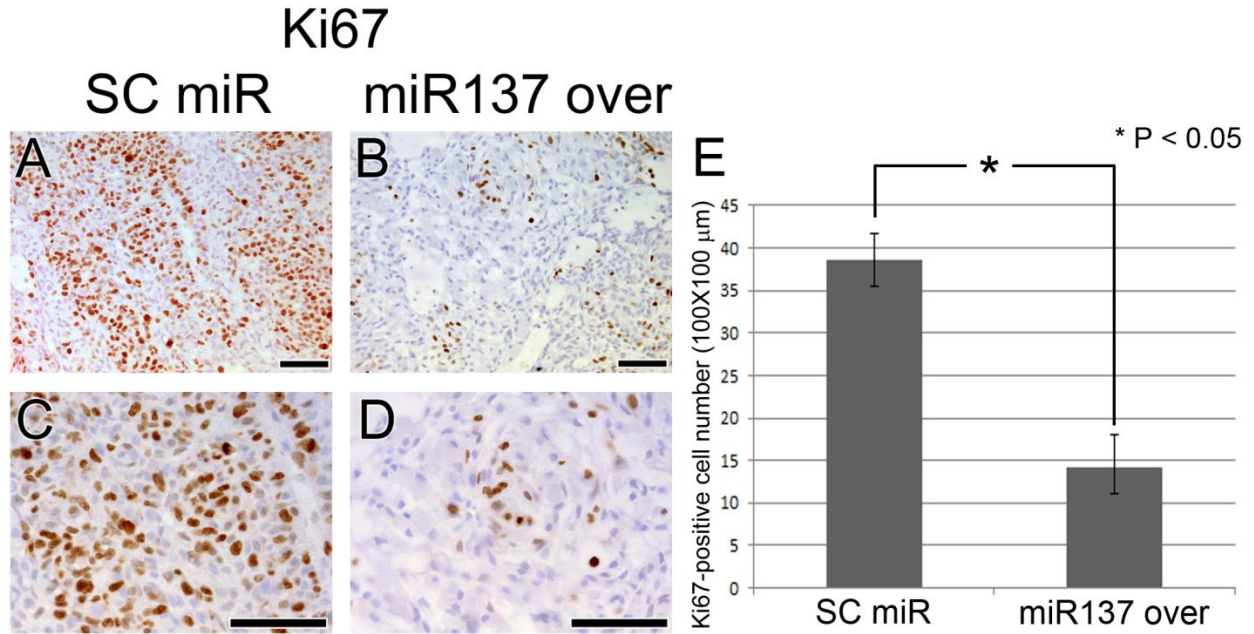

Figure S4: Cell proliferation in tumours formed by MDA-MB-231 cells over-expressing miR-137. (A, C) Large numbers of Ki67 positive proliferating cells are observed with scrambled miRNA treatment. (B, D) Cell proliferation is inhibited by over-expressed miR-137. (E) Ki67-positive cells are reduced in number in miR-137 over-expression group compared to control. Scale bar, 100 μm.

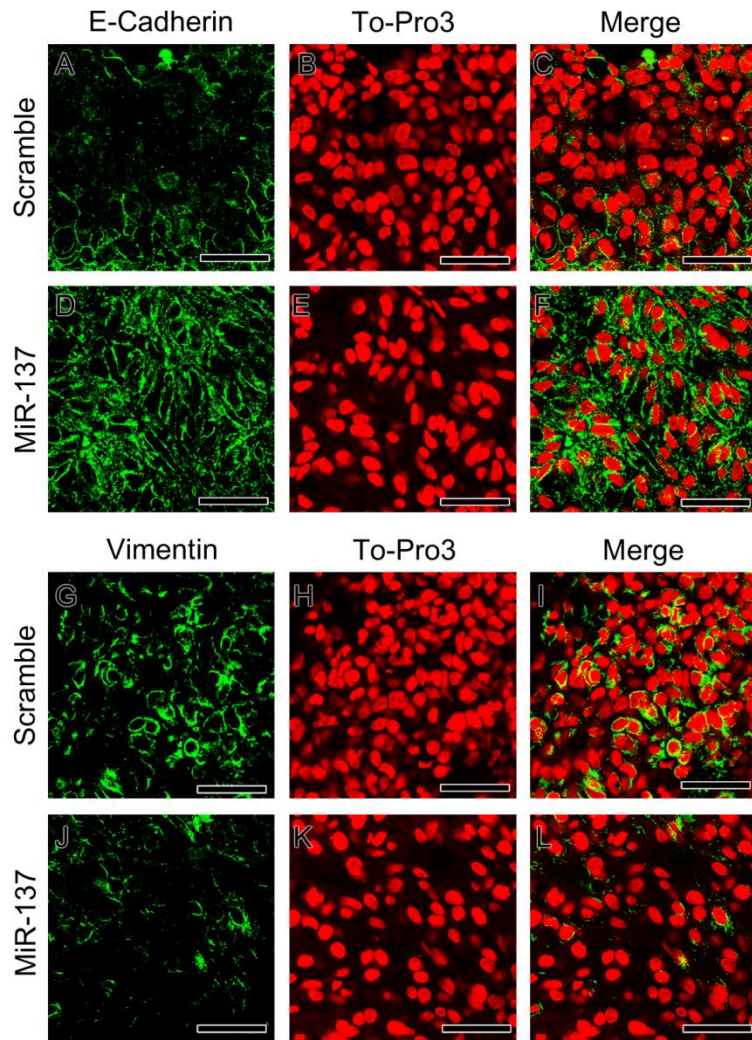

Figure S5: Altered expression of EMT markers in tumours formed by MDA-MB-231 cells over-expressing miR-137.

(A-C) Epithelial marker E-cadherin is expressed at low levels in tumours formed by cells over-expressing scrambled miRNA. (D-F) After miR-137 over-expression, E-cadherin is tightly expressed between cells in the tumour. (G-I) Mesenchymal marker Vimentin is strongly expressed in tumours formed by cells over-expressing scrambled miRNA. (J-L) Vimentin expression is markedly reduced in tumours formed by cells over-expressing miR-137. Scale bar, 100  $\mu$ m.

| Name | Forward primers, 5' to 3'       | Reverse primers, 5' to 3'                  |
|------|---------------------------------|--------------------------------------------|
| Tac1 | CCGCTCGAGACCCCTGAACGCACTATCTATT | GGAACGCGCCGCGGCGCTCCTGAAGATACATTCTTTTATT   |
| Mut  | TGTAATTCACGCGAGCACAGTGATGAAGG   | TCACTGTGCTCGCGTGAAATTACAATAATTCTACTTCTGGGG |

Figure S6: Primers used for cloning and mutagenesis for luciferase assay.
